# Supplementary material for: Frunevetmab, a felinized anti‐nerve growth factor monoclonal antibody, for the treatment of pain from osteoarthritis in cats
Source: PubMed Central journal article supplement (PMC8692178; doi:10.1111/jvim.16291), 2021-11-01
Supplement: JVIM-35-2752-s001.pdf [file JVIM-35-2752-s001.pdf]

**Supplementary Table 3:** Adverse events by VeDDRA (Veterinary Dictionary for Drug Regulatory Activities) system organ class and preferred term reported in > 2% of cats in either treatment group<sup>1</sup>

| System Organ Class                            | Preferred Term                                  | Frunevetmab    | Placebo       |
|-----------------------------------------------|-------------------------------------------------|----------------|---------------|
| Digestive tract disorders                     | Emesis                                          | 24/182 (13.2%) | 10/93 (10.8%) |
|                                               | Diarrhea                                        | 12/182 (6.6%)  | 5/93 (5.4%)   |
|                                               | Gingival disorder                               | 5/182 (2.7%)   | 0/93 (0.0%)   |
|                                               | Tooth disorder                                  | 4/182 (2.2%)   | 2/93 (2.2%)   |
|                                               | Intestinal stasis                               | 0/182 (0.0%)   | 2/93 (2.2%)   |
| Renal and urinary disorders                   | Renal insufficiency                             | 12/182 (6.6%)  | 4/93 (4.3%)   |
|                                               | Urine abnormalities                             | 8/182 (4.4%)   | 2/93 (2.2%)   |
| Systemic disorders                            | Anorexia                                        | 12/182 (6.6%)  | 4/93 (4.3%)   |
|                                               | Lethargy                                        | 11/182 (6.0%)  | 3/93 (3.2%)   |
|                                               | Dehydration                                     | 8/182 (4.4%)   | 0/93 (0.0%)   |
|                                               | Weight loss                                     | 6/182 (3.3%)   | 5/93 (5.4%)   |
| Skin and appendages disorders <sup>1, *</sup> | Dermatitis and eczema                           | 11/182 (6.0%)  | 1/93 (1.1%)   |
|                                               | Alopecia                                        | 10/182 (5.5%)  | 2/93 (2.2%)   |
|                                               | Pruritus                                        | 7/182 (3.8%)   | 0/93 (0.0%)   |
|                                               | Skin disorders NOS <sup>2</sup>                 | 6/182 (3.3%)   | 1/93 (1.1%)   |
|                                               | Skin lesions NOS <sup>2</sup>                   | 5/182 (2.7%)   | 0/93 (0.0%)   |
|                                               | Bacterial skin infection                        | 4/182 (2.2%)   | 1/93 (1.1%)   |
|                                               | Skin and/or appendage neoplasm NOS <sup>2</sup> | 3/182 (1.6%)   | 3/93 (3.2%)   |
| Musculoskeletal disorders                     | Lameness <sup>3</sup>                           | 8/182 (4.4%)   | 2/93 (2.2%)   |
|                                               | Myopathy                                        | 1/182 (0.5%)   | 2/93 (2.2%)   |
| Application site disorders                    | Injection site pain                             | 7/182 (3.8%)   | 4/93 (4.3%)   |
| Psychological disorders                       | Abnormal behavior                               | 7/182 (3.8%)   | 1/93 (1.1%)   |
| Unclassifiable event                          | Unclassifiable adverse event                    | 6/182 (3.3%)   | 3/93 (3.2%)   |
| Ear and labyrinth disorders                   | Otitis externa                                  | 4/182 (2.2%)   | 0/93 (0.0%)   |
| Eye disorders                                 | Eye disorder NOS <sup>2</sup>                   | 4/182 (2.2%)   | 3/93 (3.2%)   |
| Respiratory tract disorders                   | Sneezing                                        | 2/182 (1.1%)   | 3/93 (3.2%)   |
|                                               | Rhinitis                                        | 1/182 (0.5%)   | 3/93 (3.2%)   |
| Blood and lymphatic system disorders          | Leukocytosis                                    | 1/182 (0.5%)   | 3/93 (3.2%)   |
| Behavioral disorders                          | Anxiety                                         | 0/182 (0.0%)   | 2/93 (2.2%)   |
| Cardio-vascular system disorders              | Murmur                                          | 0/182 (0.0%)   | 2/93 (2.2%)   |
| Neurological disorders                        | Convulsion                                      | 0/182 (0.0%)   | 2/93 (2.2%)   |

\* Higher percentages of AEs in this category in the frunevetmab treated cats compared to placebo treated cats (P<0.0001). No relationship between AE reports and study day

1 If a cat experienced the same event more than once, then only the first occurrence was tabulated.

2 Not Otherwise Specified (NOS)

3 New lameness or worsening of previous lameness.
