# Supplementary material for: Frunevetmab, a felinized anti‐nerve growth factor monoclonal antibody, for the treatment of pain from osteoarthritis in cats
Source: PubMed Central journal article supplement (PMC8692178; doi:10.1111/jvim.16291), 2021-11-01
Supplement: JVIM-35-2752-s003.pdf [file JVIM-35-2752-s003.pdf]

**Supplementary Table 4.** Selected hematological, serum chemistry, and urinalysis parameters at baseline (screening) and at the end of the study (Day 84) in cats treated with frunevetmab or placebo. Means and standard deviations (SD) are reported, as are the number of cases that were above ('High') or below ('Low') the reference range (provided in units used in the study). \* n= 93(screening), n=85 (Day 84); for USG n=90 (screening), n=79 (Day 84) \*\*n=182 (screening), n=165(Day 84); for USG n=175 (screening), n=149 (Day 84)

| Variable                  | Placebo* |      |     |      | Frunevetmab** |      |     |      | P-value | Reference Interval |
|---------------------------|----------|------|-----|------|---------------|------|-----|------|---------|--------------------|
|                           | Mean     | SD   | Low | High | Mean          | SD   | Low | High |         |                    |
| Hematocrit - screening    | 38.0     | 6.0  | 5   | 0    | 38.1          | 6.1  | 7   | 1    | 0.8073  | 28.2-52.7%         |
| Hematocrit - Day 84       | 39.2     | 5.6  | 2   | 1    | 39.2          | 6.0  | 6   | 1    |         |                    |
| ALP - screening           | 25       | 11   | 1   | 1    | 24            | 13   | 12  | 2    | 0.5994  | 12-59 U/L          |
| ALP - Day 84              | 26       | 13   | 2   | 2    | 25            | 15   | 12  | 4    |         |                    |
| ALT - screening           | 54       | 31   | 4   | 1    | 55            | 29   | 2   | 2    | 0.1746  | 27-158 U/L         |
| ALT - Day 84              | 62       | 58   | 4   | 3    | 55            | 28   | 4   | 3    |         |                    |
| BUN - screening           | 30       | 8    | 0   | 14   | 31            | 9    | 2   | 35   | 0.0545  | 16-37 mg/dL        |
| BUN - Day 84              | 31       | 9    | 0   | 16   | 32            | 10   | 0   | 46   |         |                    |
| Creatinine - screening    | 1.5      | 0.4  | 4   | 3    | 1.5           | 0.4  | 3   | 4    | 0.2192  | 0.9-2.5 mg/dL      |
| Creatinine - Day 84       | 1.5      | 0.5  | 2   | 1    | 1.6           | 0.5  | 7   | 7    |         |                    |
| SDMA - screening          | 12       | 4    | 0   | 25   | 13            | 4    | 0   | 52   | 0.6381  | 0-14 ug/dL         |
| SDMA - Day 84             | 13       | 4    | 0   | 23   | 14            | 5    | 0   | 52   |         |                    |
| Total Protein - screening | 7.2      | 0.6  | 1   | 1    | 7.1           | 0.5  | 10  | 0    | 0.5127  | 6.3-8.8 g/dL       |
| Total Protein - Day 84    | 7.4      | 0.6  | 1   | 3    | 7.3           | 0.5  | 6   | 0    |         |                    |
| Albumin - screening       | 3.2      | 0.3  | 3   | 0    | 3.1           | 0.3  | 5   | 0    | 0.1157  | 2.6-3.9 g/dL       |
| Albumin - Day 84          | 3.1      | 0.3  | 3   | 0    | 3.1           | 0.3  | 5   | 0    |         |                    |
| USG - screening           | 1.03     | 0.01 |     |      | 1.03          | 0.01 |     |      | N/A     | N/A                |
| USG - Day 84              | 1.03     | 0.02 |     |      | 1.03          | 0.02 |     |      |         |                    |
