# Supplementary material for: Frunevetmab, a felinized anti‐nerve growth factor monoclonal antibody, for the treatment of pain from osteoarthritis in cats
Source: PubMed Central journal article supplement (PMC8692178; doi:10.1111/jvim.16291), 2021-11-01
Supplement: JVIM-35-2752-s004.pdf [file JVIM-35-2752-s004.pdf]

## Supplementary Table 2. NC State Translational Research in Pain (TRiP) Feline Musculoskeletal Pain Scoring System

### Joint Evaluation and Scoring.

The following table was completed during the orthopedic examination based on the examiner's subjective assessment of each joint following palpation and passive extension, flexion and other manipulations as deemed appropriate. *Note: in the study reported here, the scoring was modified to be on a 1-5 (pain) or 1-3 (crepitus, effusion, thickening) scale to facilitate statistical analysis.*

| R Forelimb    | Pain (0-4) | Crepitus (0-2) | Effusion (0-2) | Thickening (0-2) |
|---------------|------------|----------------|----------------|------------------|
| Feet          |            |                |                |                  |
| Carpus        |            |                |                |                  |
| Elbow         |            |                |                |                  |
| Shoulder      |            |                |                |                  |
| R Hindlimb    | Pain (0-4) | Crepitus (0-2) | Effusion (0-2) | Thickening (0-2) |
| Feet          |            |                |                |                  |
| Hock          |            |                |                |                  |
| Stifle        |            |                |                |                  |
| Hip           |            |                |                |                  |
| L Forelimb    | Pain (0-4) | Crepitus (0-2) | Effusion (0-2) | Thickening (0-2) |
| Feet          |            |                |                |                  |
| Carpus        |            |                |                |                  |
| Elbow         |            |                |                |                  |
| Shoulder      |            |                |                |                  |
| L Hindlimb    | Pain (0-4) | Crepitus (0-2) | Effusion (0-2) | Thickening (0-2) |
| Feet          |            |                |                |                  |
| Hock          |            |                |                |                  |
| Stifle        |            |                |                |                  |
| Hip           |            |                |                |                  |
| Spinal Column | Pain (0-4) |                |                |                  |
| Cervical      |            |                |                |                  |
| Thoracic      |            |                |                |                  |
| T-L           |            |                |                |                  |
| Lumbar        |            |                |                |                  |
| L-S           |            |                |                |                  |

#### Key to scoring

##### Pain scale based on palpation

- 0 **No resentment**; normal amount of movement or wriggling
- 1 **Mild withdrawal**; mildly resists
- 2 **Moderate withdrawal**; body tenses; **may orient** to site; **may vocalize** / increase in vocalization
- 3 **Orients to site**; **forcible withdrawal** from manipulation; may vocalize or hiss or bite
- 4 **Tries to escape / prevent manipulation**; **bite/hiss**; marked guarding of area

Crepitus, Effusion, Thickening: none (0); slight-moderate (1); significant-severe (2)
